# Supplementary material for: Programmable 3D rigid clathrate hydrogels based on self-assembly of tetrahedral DNA and linker PCR products
Source: Royal Society of Chemistry journal article supplement (doi:10.1039/d0cc05898j), 2020-01-01
Supplement: d0cc05898j1.pdf [file d0cc05898j1.pdf]

## **Electronic Supplementary Information (ESI)**

### **Programmable 3D Rigid Clathrate Hydrogels Based on Self-assemble of Tetrahedral DNA and Linker PCR Products**

Xu Chen,<sup>a,b</sup> Yinxia Xie,<sup>b</sup> Yangzi Zhang,<sup>a,b</sup> Chenwei Li,<sup>a,b</sup> Wentao Xu,<sup>a,b,\*</sup>

<sup>a</sup> Beijing Advanced Innovation Center for Food Nutrition and Human Health, College of Food  
Science and Nutritional Engineering, China Agricultural University, Beijing 100083, China.

<sup>b</sup> Key Laboratory of Safety Assessment of Genetically Modified Organism (Food Safety), Ministry  
of Agriculture, P. R. China, Beijing, 100083, China.

\* Corresponding author: Wentao Xu; E-mail: xuwentao@cau.edu.cn.

Fax: +8610 62738793; Tel: +8610 62738793

#### **Table of Content:**

#### **1. Experimental section.**

##### **1.1 Materials and methods.**

##### **1.2 UV-vis spectroscopy**

##### **1.3 SEM characterization of TDN-PCR hydrogels.**

##### **1.4 Agarose gel electrophoresis.**

##### **1.5 Rheological characterization of TDN-PCR hydrogels.**

##### **1.6 SEM-EDS analysis.**

#### **2. Table S1. Experimental DNA Sequences.**

#### **3. Double stranded DNA show lower binding affinity toward the gold nanoparticle surface.**

#### **4. Preparation of rigid double-strand DNA.**

#### **5. Combination of different volume ratios of TDN-p system and linker PCR products.**

#### **6. SEM imaging and SEM-EDS analysis**

#### **7. Dynamic rheological characteristics of TDN hydrogel.**

#### **8. Results of selectivity verification.**

## 29 1. Experimental section

### 30 1.1 Materials and methods.

31 The *Salmonella* spp. was preserved in 20% (v/v) glycerol solution at -80 °C until  
32 it was used. Strain was grown in Luria-Bertani broth medium (NaCl 5 g, yeast extract  
33 5 g, tryptone 10 g and H<sub>2</sub>O to 1000 mL) at 37 °C for 16 h. This process was followed  
34 by the extraction of genomic DNA templates with a Bacteria DNA Kit (TianGen,  
35 Beijing, China) according to the method described by TIANamp Bacteria DNA Kit  
36 Handbook.<sup>1</sup> The different sequences of oligonucleotides with spacer (Table S1) were  
37 designed to construct a TDN-p. The core unit of TDN was assembled using four  
38 designed DNA strands. All single-stranded DNAs were purchased from Invitrogen TM  
39 (Shanghai, China). The TDN was assembled with single-stranded Ta-p, Tb-p, Tc-p, or  
40 Td-p; A certain amount of each single-stranded DNA was added to Tris-MgCl<sub>2</sub> solution  
41 [10 mM Tris and 20 mM MgCl<sub>2</sub>(pH 8)]. The TDN-p was assembled at 95 °C for 3 min  
42 and cooled rapidly to 4 °C for 5 min in the Life Express Thermal Cycler (Hangzhou  
43 BIOER Technology Co., Ltd.). F1-primer and R1-primer including the forward primer  
44 and reverse primer of *salmonella* genome, respectively, which partially complementary  
45 to TDN-p connection arm. Linker PCR products was assembled consists of two parts.  
46 The first part is the amplification reaction of *salmonella* genome. The process including  
47 heated at 95 °C for 30s, cooled to 53 °C for 30s and maintained at 72 °C for 45s repeated  
48 for 50 times in the Life Express Thermal Cycler (Hangzhou BIOER Technology Co.,  
49 Ltd.). The second part is the amplification reaction for introducing complementary  
50 linker. This process was same with the first part except different template was used.  
51 Note that linker PCR products of *salmonella* genome can be obtained by one round of  
52 amplification in real-world applications. All other chemicals were of analytical grade,  
53 and all chemicals were used without further purification. All solutions were prepared  
54 with Milli-Q water (resistivity = 18 MΩ cm) from a Millipore system.

### 55 1.2 UV-vis spectroscopy

56 UV-vis spectroscopy was used to record the absorbance of each solution before and  
57 after the addition of NaCl.<sup>2</sup>

### 58 **1.3 SEM characterization of TDN-PCR hydrogels.**

59 The TDN-p and TDN-PCR products were quick-frozen in the liquid nitrogen and then  
60 fully dried in a vacuum-freeze dryer overnight. The dried samples were Pt-coated with  
61 20 mA for 6 minutes and characterized by using scanning electron microscope at the  
62 voltage of 5 kV.

### 63 **1.4 Agarose gel electrophoresis.**

64 The *Salmonella* genome used in this study and TDN-PCR products were analyzed  
65 by 2.0% agarose gel electrophoresis.

### 66 **1.5 Rheological characterization of TDN-PCR hydrogels.**

67 Rheological tests of TDN-PCR hydrogels proceeded by rheometer with a gap of  
68 0.15 mm, which was consistent previous study.<sup>3</sup> Frequency sweep test was carried out  
69 from 0.1 to 10 Hz with a fixed strain of 1 % and a fixed temperature of 25°C.  
70 Temperature sweep test was carried out from 25°C to 75°C at a heating rate of 1 °C/min  
71 with a fixed strain of 1 % and a fixed frequency of 1 Hz.

### 72 **References**

- 73 1. Y. Zhang, S. Li, J. Tian, K Li, Z. Du, W. Xu, Universal linker Polymerase Chain Reaction-  
74 triggered Strand Displacement Amplification visual biosensor for ultra-sensitive detection of  
75 *Salmonella*. *Talanta*, 2021, 222, 121575.
- 76 2. Z. Wang, J. Zhang, J. Ekman, P. Kenis, Y. Lu, DNA-Mediated Control of Metal Nanoparticle  
77 Shape: One-Pot Synthesis and Cellular Uptake of Highly Stable and Functional Gold  
78 Nanoflowers. *Nano Lett.*, 2010, 10, 1886-1891.
- 79 3. H. Song, Y. Zhang, P. Cheng, X. Chen, Y. Luo, W. Xu, Rapidly self-assembling soft-brush DNA  
80 hydrogel based on RCA Products. *Chem. Commun.*, 2019, 55, 5375-5378.

### 81 **1.6 SEM-EDS analysis.**

82 Imaging in energy dispersive X-ray spectroscopy (EDS) analysis using an S-4800  
83 Scanning Electron Microscope (Hitachi, Japan) equipped with Energy-Dispersive  
84 spectrometer (Oxfordshire, United Kingdom) for elemental analysis (punctual and  
85 imaging). The samples were prepared by quick-frozen in the liquid nitrogen and then  
86 fully dried in a vacuum-freeze dryer overnight. The dried samples were Pt-coated at  
87 vacuum for 6 minutes. Measurements over three times per sample were carried out.

88 **2. Table S1. Experimental DNA Sequences.**

89 **Table S1** DNA sequence used in our experiments

| Name      | Sequence (5'→3')                                                                             |
|-----------|----------------------------------------------------------------------------------------------|
| Ta-p      | <u>ACCTAAGCTCCAGTGGCT</u> TTTTTTTACATTCCTAAGTCTGAAACATTACA<br>GCTTGCTACACGAGAAGAGCCGCCATAGTA |
| Tb-p      | <u>ACCTAAGCTCCAGTGGCT</u> TTTTTTTATCACCAGGCAGTTGACAGTGTAG<br>CAAGCTGTAATAGATGCGAGGGTCCAATAC  |
| Tc-p      | <u>ACCTAAGCTCCAGTGGCT</u> TTTTTTTCAACTGCCTGGTGATAAAACGACA<br>CTACGTGGGAATCTACTATGGCGGCTCTTC  |
| Td-p      | <u>ACCTAAGCTCCAGTGGCT</u> TTTTTTTTCAGACTTAGGAATGTGCTTCCCA<br>CGTAGTGTCGTTTGTATTGGACCCTCGCAT  |
| F         | TCACC GTGGT CCAGT TTATC                                                                      |
| R         | CATCA ATACT CATCT GTTTA CCG                                                                  |
| F1-primer | AGCC ACTGG AGCTT AGGT TTTTTT <b>X</b> TCACC GTGGT CCAGT TTATC                                |
| R1-primer | AGCC ACTGG AGCTT AGGTTTTTT <b>X</b> CATCA ATACT CATCT GTTTA<br>CCG                           |
| P12       | TTAGGTTGGATT                                                                                 |
| P24       | TGGAGCTTAGGTTGGATTTCGAGGT                                                                    |
| P36       | AGCCACTGGAGCTTAGGTTGGATTTCGAGGTCACCGA                                                        |

90 “X” indicates SpacerC18. F and R represent forward primer and reverse primer of  
 91 salmonella genome, respectively. Forward primer was same with segmental DNA  
 92 sequence of salmonella genome, while reverse primer was reverse complement with  
 93 segmental DNA sequence of salmonella genome. Thus, this method displays excellent  
 94 selectivity for Salmonella detection and it can be used for detection of virtually any  
 95 target based on the change of forward primer and reverse primer.

96 **3. Double stranded DNA show lower binding affinity toward the gold nanoparticle**

97 **surface**

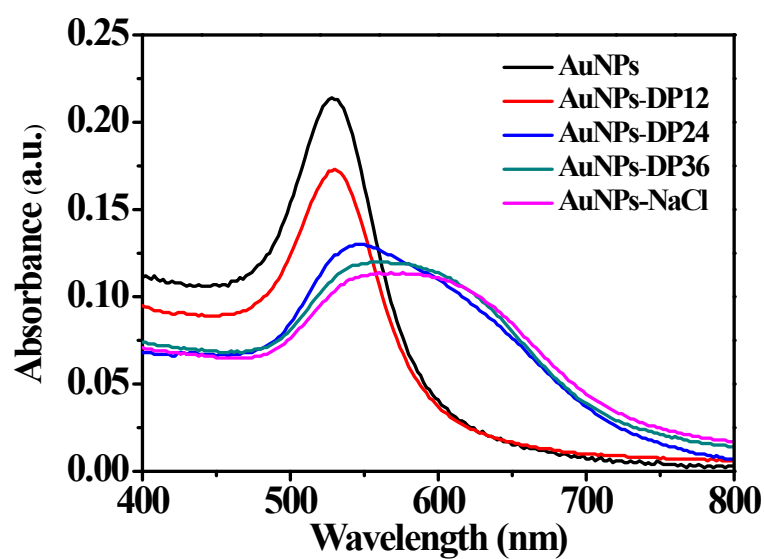

98

99 **Fig. S1** UV-vis spectra of the gold nanoparticle solutions treated with 0.1 M NaCl after the addition  
100 of double-strand P12 (DP12), double-strand P24 (DP24), double-strand P36 (DP36), or without  
101 adding DNA.

102

103 **4. Preparation of rigid double-strand DNA.**

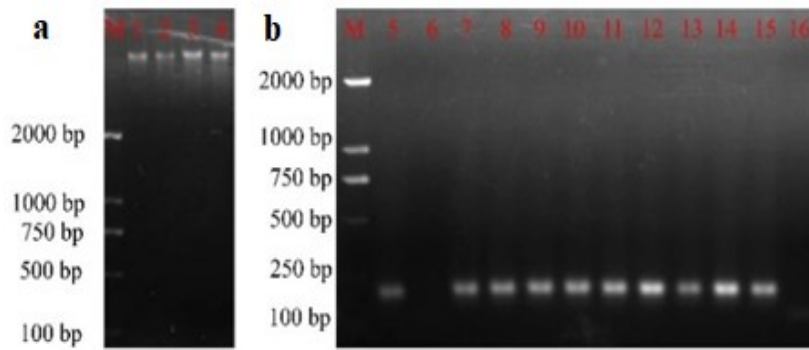

104  
105 **Fig. S2** Extraction of Salmonella genome (1-4: Salmonella DNA) and amplification results of  
106 PCR (5, 7-15 linker PCR products; 6 negative control without template; 16 PCR products).  
107

108 **5. Combination of different volume ratios of TDN-p system and linker PCR**  
109 **products.**

110

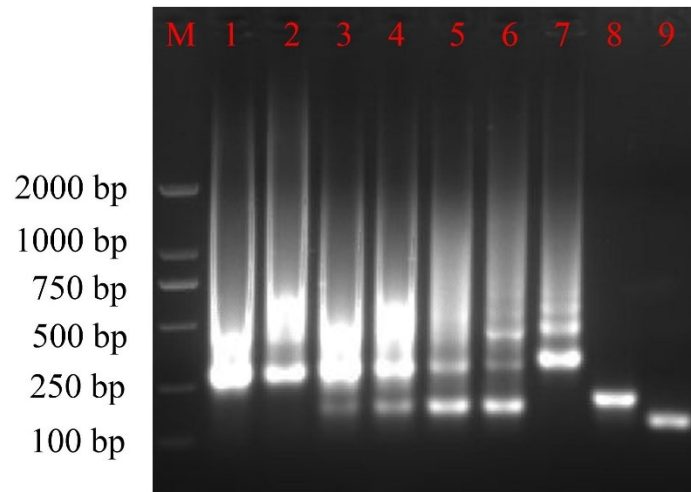

111

112 **Fig. S3** Lanes 1-6 show TDN constructed with different ratios of linker PCR products (1:  
113 1, 1: 2, 1: 5, 1: 10, 1: 15, 1: 20, v/v), respectively. Lane 7 shows TDN-p. Lanes 8 and  
114 9 show linker PCR products and PCR products (constructed with TDN-p and its terminal  
115 complementary strand).

117 **6. SEM imaging and SEM-EDS analysis**

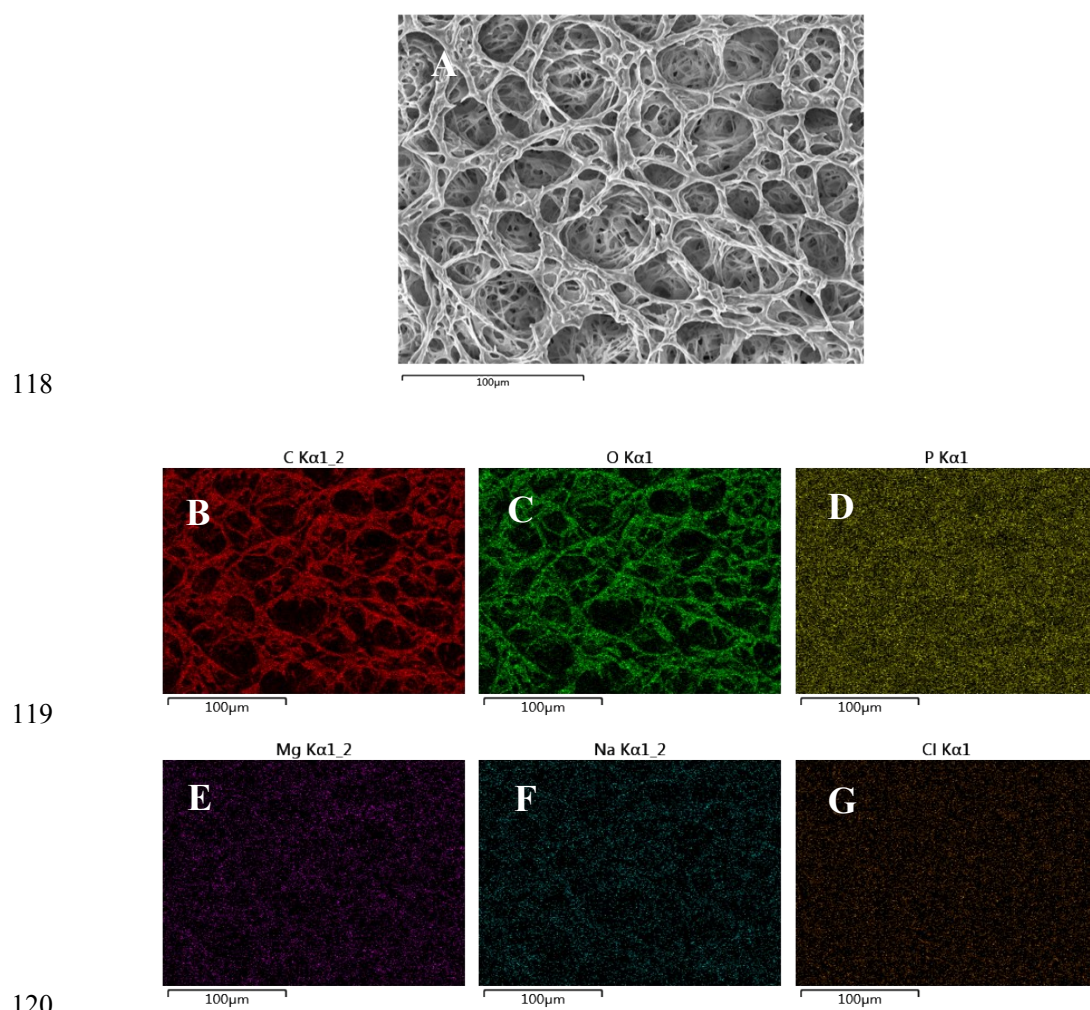

121 **Fig. S4** Characterization of the TDN-p hydrogels by SEM imaging and SEM-EDS analysis.  
122 (A) Representative SEM image of TDN-p hydrogels, and (B-G) SEM-EDS elemental maps  
123 of C, O, P, Mg, Na and Cl of TDN-p hydrogels.  
124



125

126

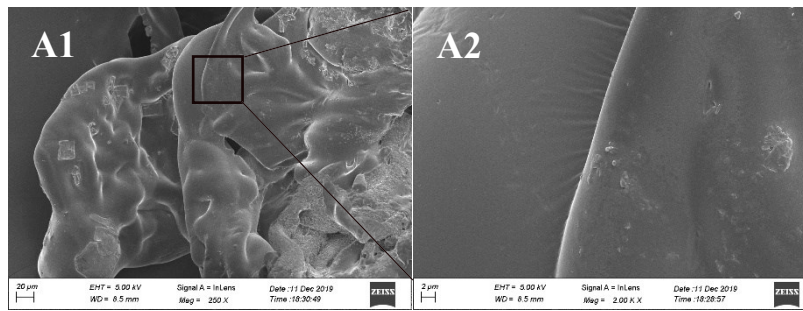

127

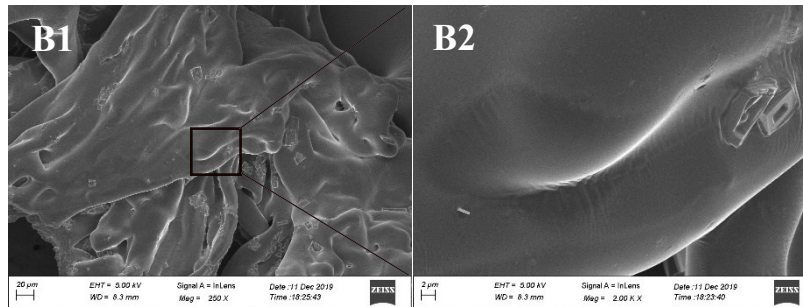

128

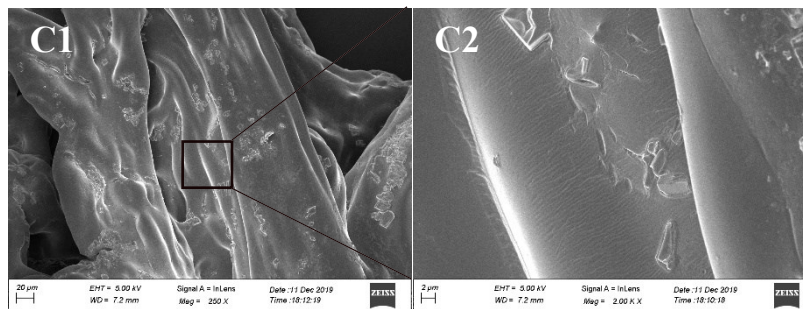

129 **Fig. S5** SEM characterization of soft TDN hydrogels performed by single-strand DNA (A:  
130 P12, B: P24, C: P36) and TDN-p.

131

132

## 7. Dynamic rheological characteristics of TDN hydrogel.

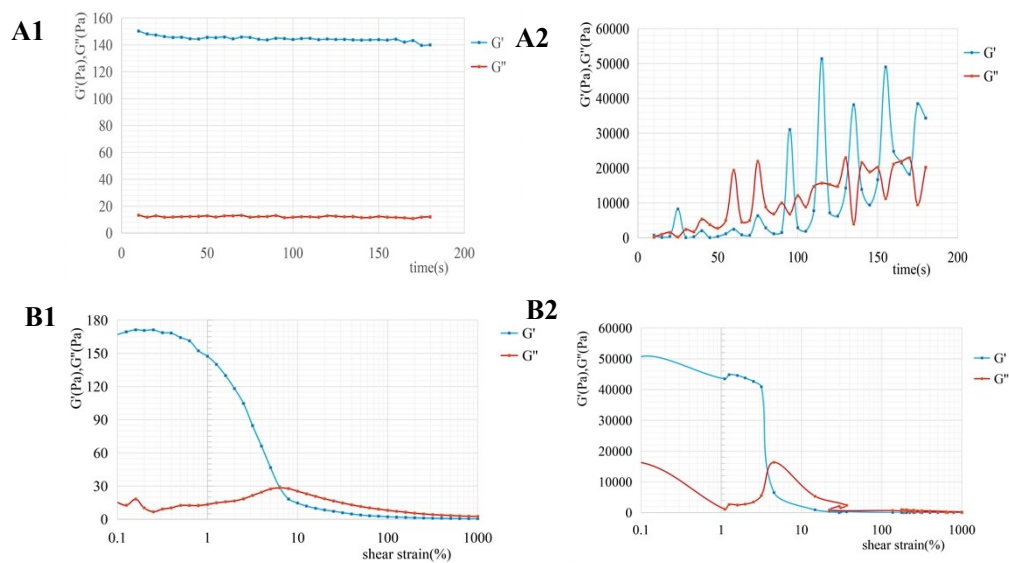

**Fig. S6** Dynamic rheological characteristics of TDN hydrogel (A: Time scan test; B: Shear strain test. 1: Soft TDN-PCR hydrogels performed by single-strand DNA; 2: Rigid TDN-PCR hydrogels performed by double-strand DNA).

140 **8. Results of selectivity verification.**

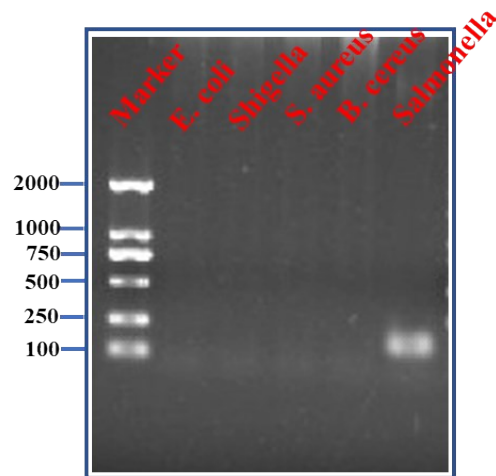

141

142 **Fig. S7.** Results of selectivity verification. F1-primer and R1-primer were used for preparing linker  
143 PCR products. E. coli, Shigella, S. aureus, B. cereus and salmonella genome was used as template,  
144 respectively.
